# Supplementary material for: Highly sensitive and specific assessment of ochratoxin A in herbal medicines via activator regeneration by electron transfer ATRP
Source: Royal Society of Chemistry journal article supplement (doi:10.1039/d2nj03180a), 2022-01-01
Supplement: d2nj03180a1.pdf [file d2nj03180a1.pdf]

## Highly sensitive and specific assessment of ochratoxin A in herbal medicines via activator regeneration by electrontransfer ATRP

Zhenzhen Cui,<sup>a</sup> Liang Guo,<sup>a</sup> Zhenyu Jin,<sup>a</sup> Lele Ma,<sup>a</sup> Huaixia Yang,<sup>\*a</sup> and Mingsan Miao<sup>\*a</sup>

<sup>a</sup> Pharmacy College, Henan University of Chinese Medicine, Zhengzhou 450046, People's Republic of China;

\*Correspondence author:

Huaixia Yang (yanghuaixia886@163.com);

Mingsan Miao (miaomingsan@163.com)

Table S1 The comparison of the time between this method and other methods

| Methods                   | Time (h) | References  |
|---------------------------|----------|-------------|
| surface plasmon resonance | 1.5      | [1]         |
| fluorescence              | 2        | [2]         |
| DNAzyme                   | 4        | [3]         |
| fluorescence              | 1.5      | [4]         |
| fluorescence              | 0.5      | This method |

1 M. Bianco, A. Sonato, A. De Girolamo, M. Pascale, F. Romanato, R. Rinaldi and V. Arima, *Sensor. Actuat. B Chem*, 2017, **241**, 314-320.

2 X. Shao, L. Zhu, Y. Feng, Y. Zhang, Y. Luo, K. Huang and W. Xu, *Anal. Chim. Acta*,

2019, **1087**, 113–120.

3 E. Santovito, D. Greco, V. D'Ascanio, S. M. Sanzani and G. Avantaggiato, *Anal. Chim.*

*Acta*, 2020, **1133**, 20-29.

4 X. Song, Q. Ding, Y. Pu, J. Zhang, R. Sun, L. Yin, W. Wei and S. Liu, *Biosens.*

*Bioelectron*, 2021, **192**, 113537.

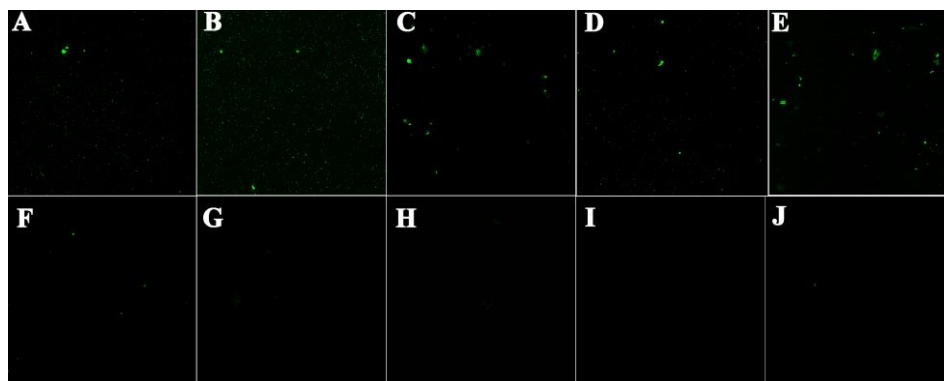

Fig. S1 The confocal images for extracts of forsythia without OTA (A), forsythia with OTA (F), astragalus without OTA (B), astragalus with OTA (G), licorice without OTA (C), licorice with OTA (H), xanthium without OTA (D), xanthium with OTA (I), malt without OTA (E), malt with OTA (J).
